# Supplementary material for: The evolutionary dynamics of Oropouche Virus (OROV) in South America
Source: bioRxiv or medRxiv preprint supplement (doi:10.1101/682559), 2019-06-26

### L segment

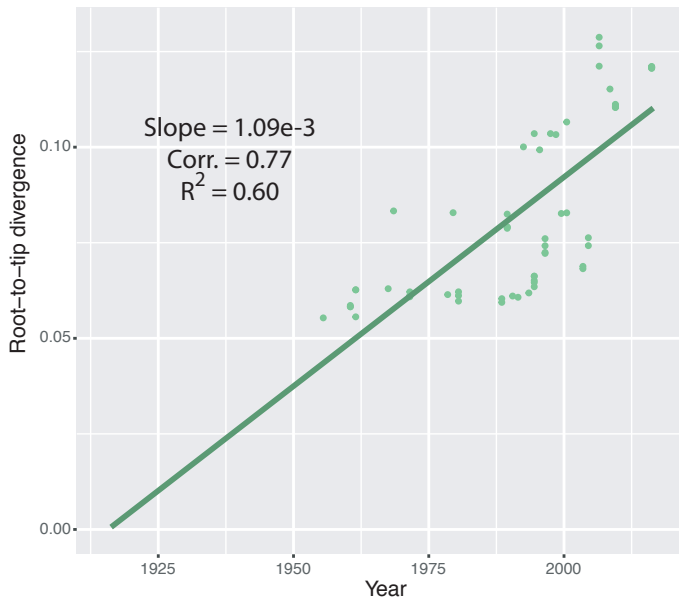

### S segment

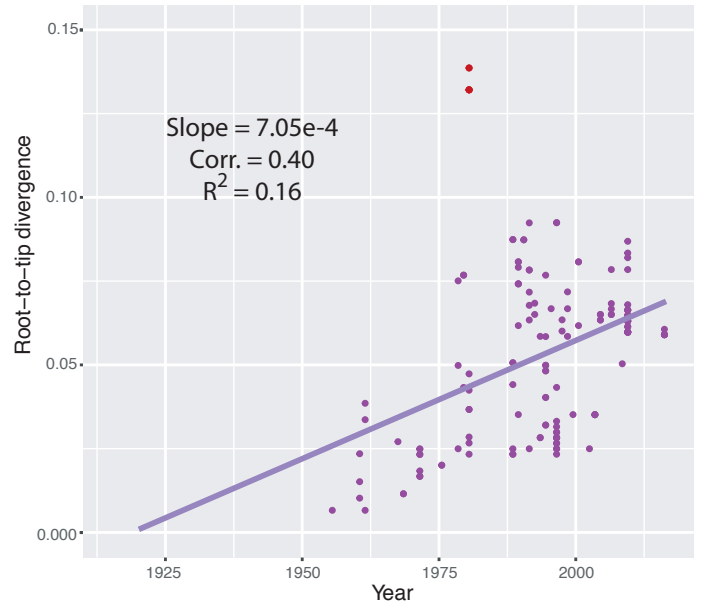

### M segment

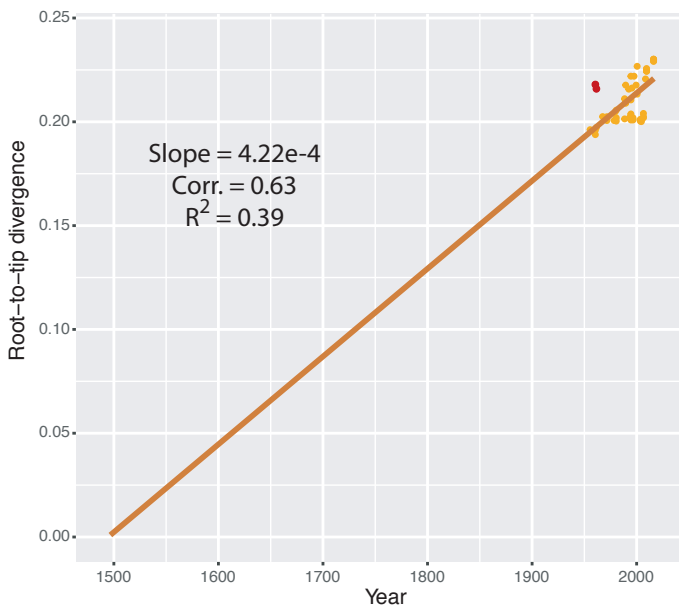

### Lineage 1

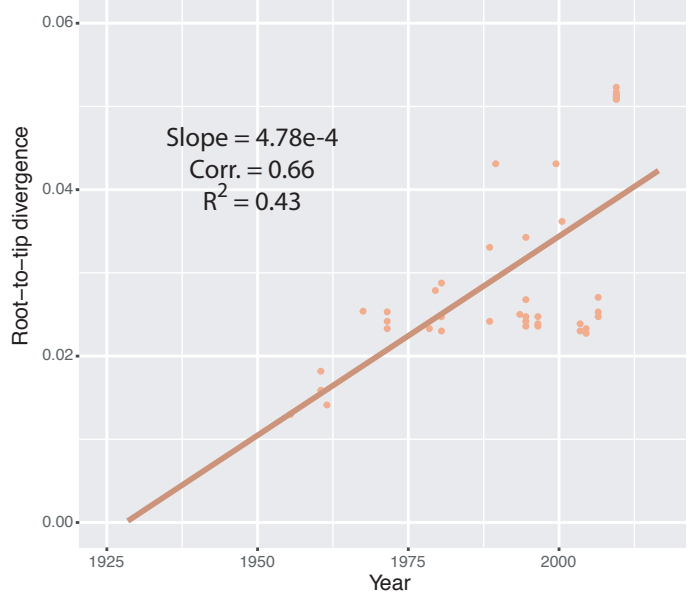

### Lineage 2

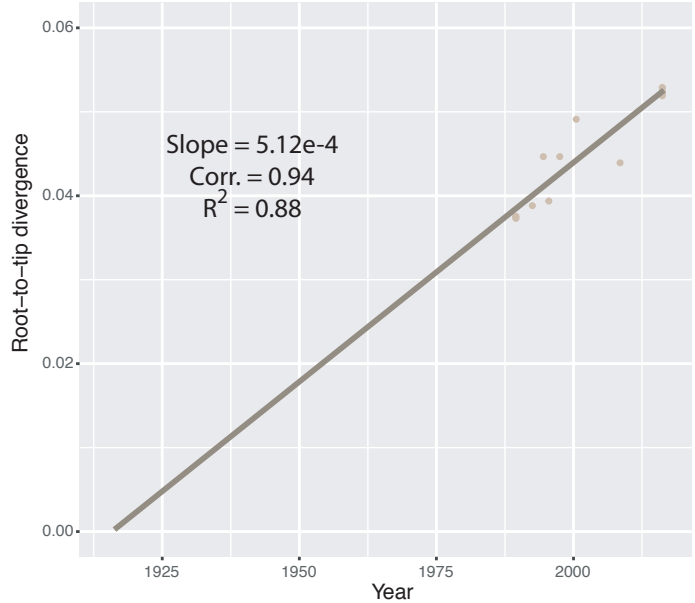

Supplement: Supplementary file [file media-1.pdf]
