# Supplementary material for: The evolutionary dynamics of Oropouche Virus (OROV) in South America
Source: bioRxiv or medRxiv preprint supplement (doi:10.1101/682559), 2019-06-26
Supplement: Supplementary file [file media-2.pdf]

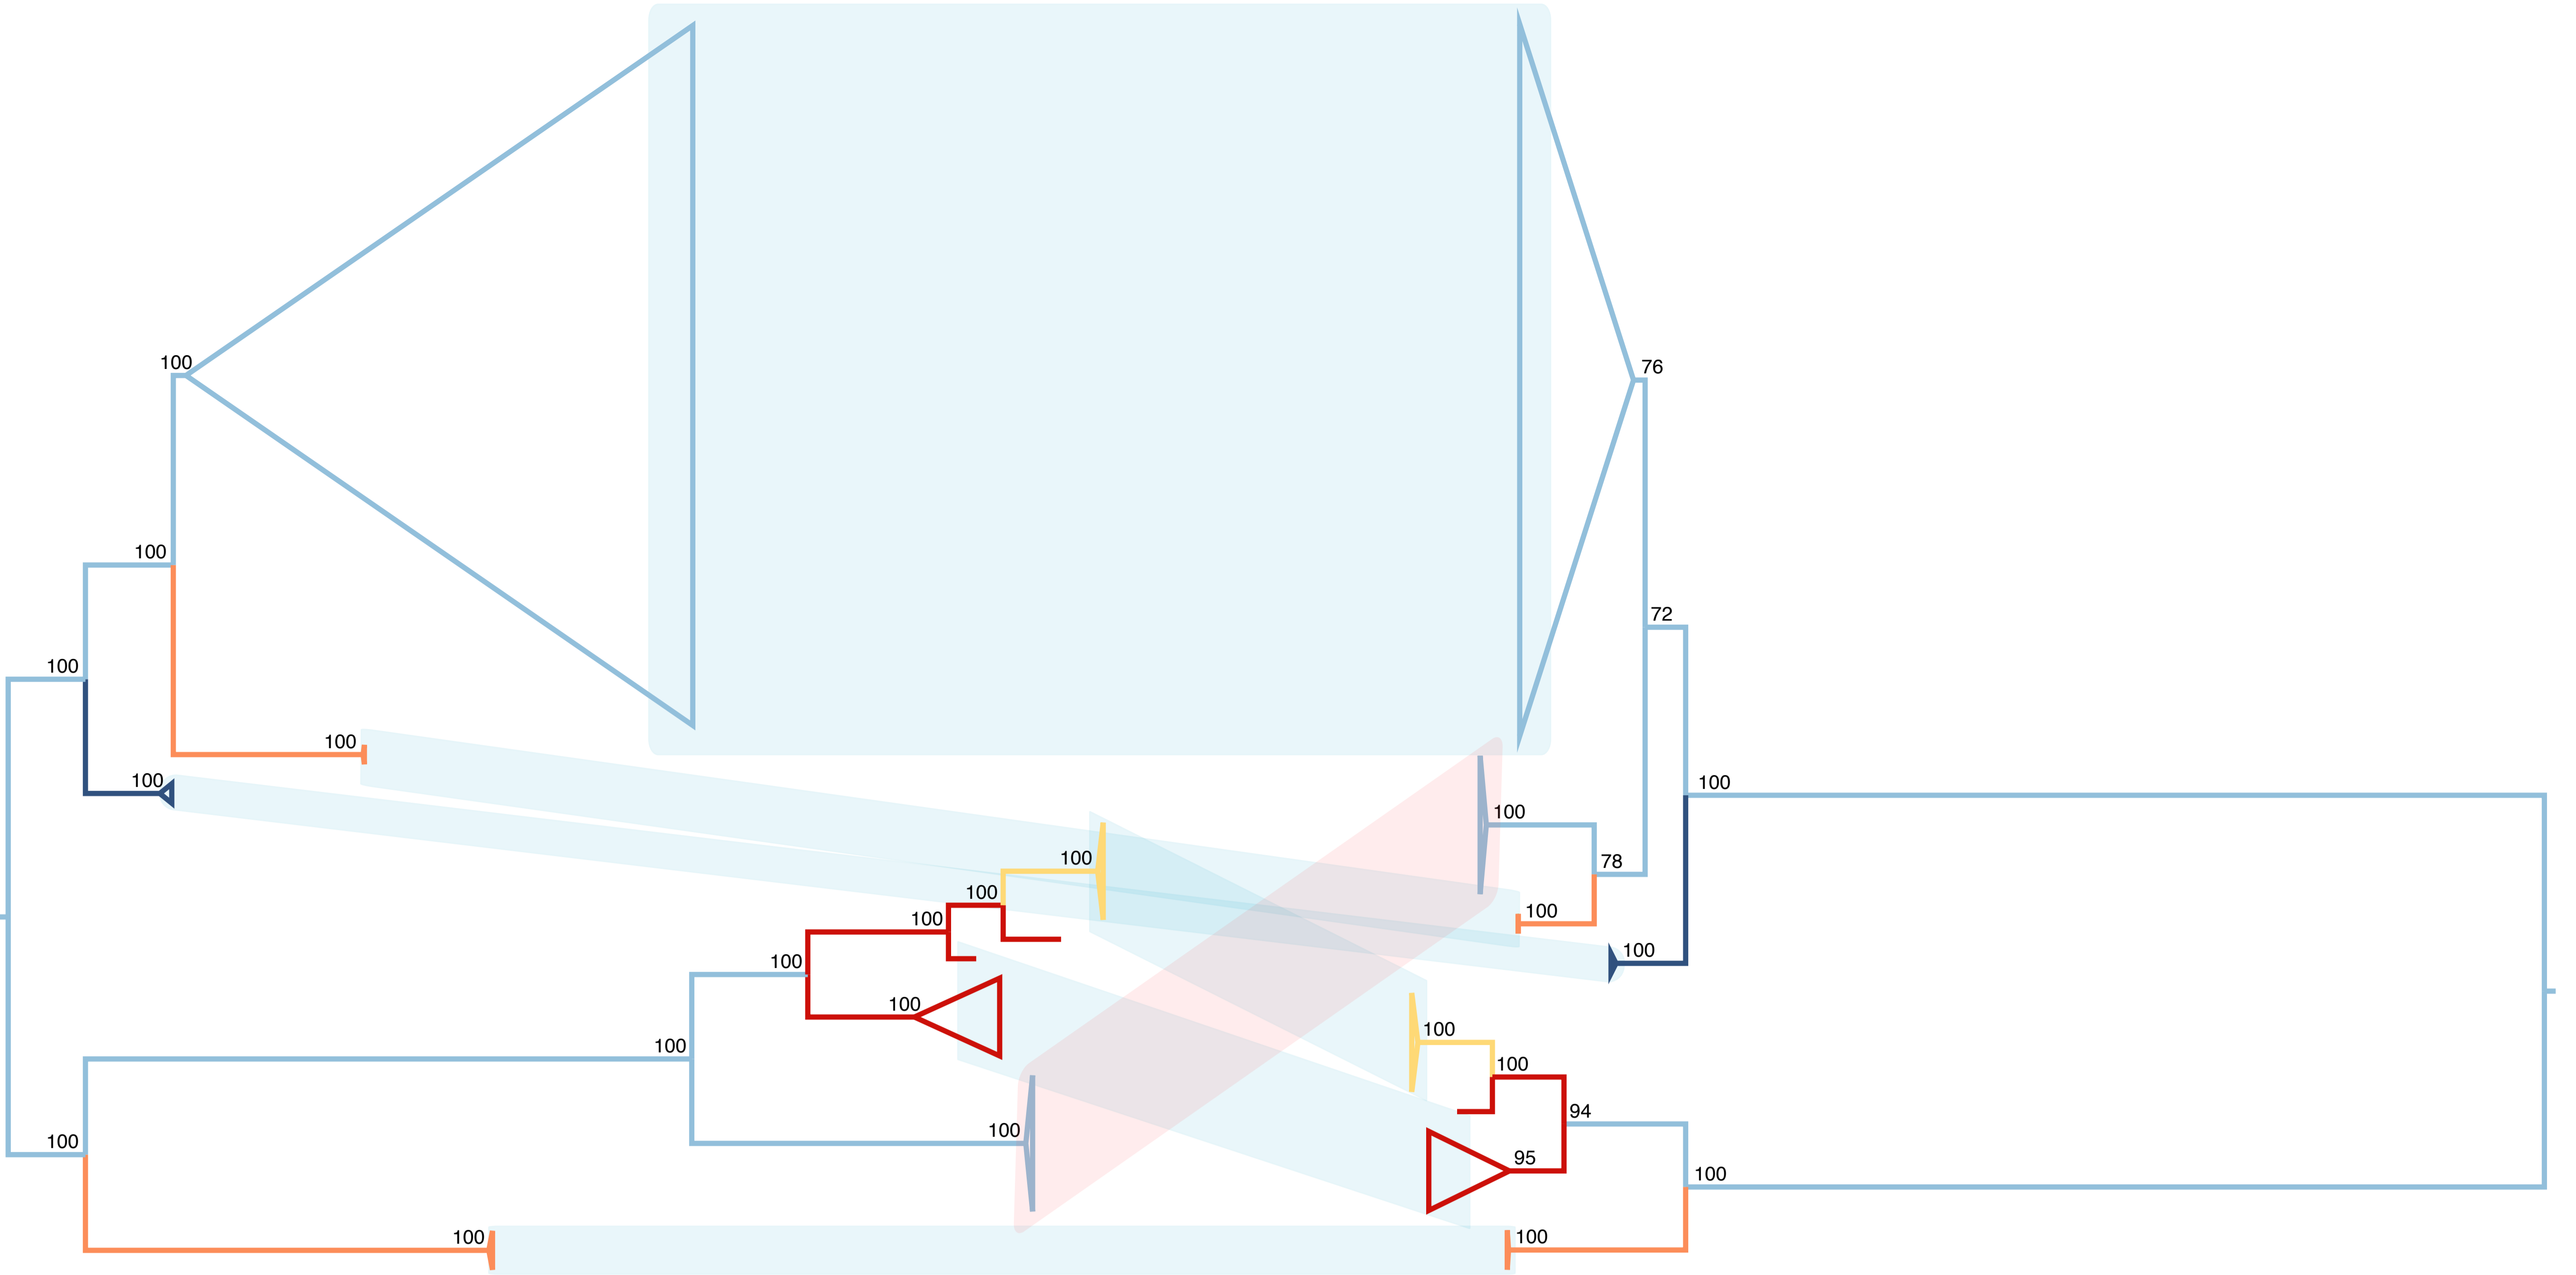

L Segment

M Segment

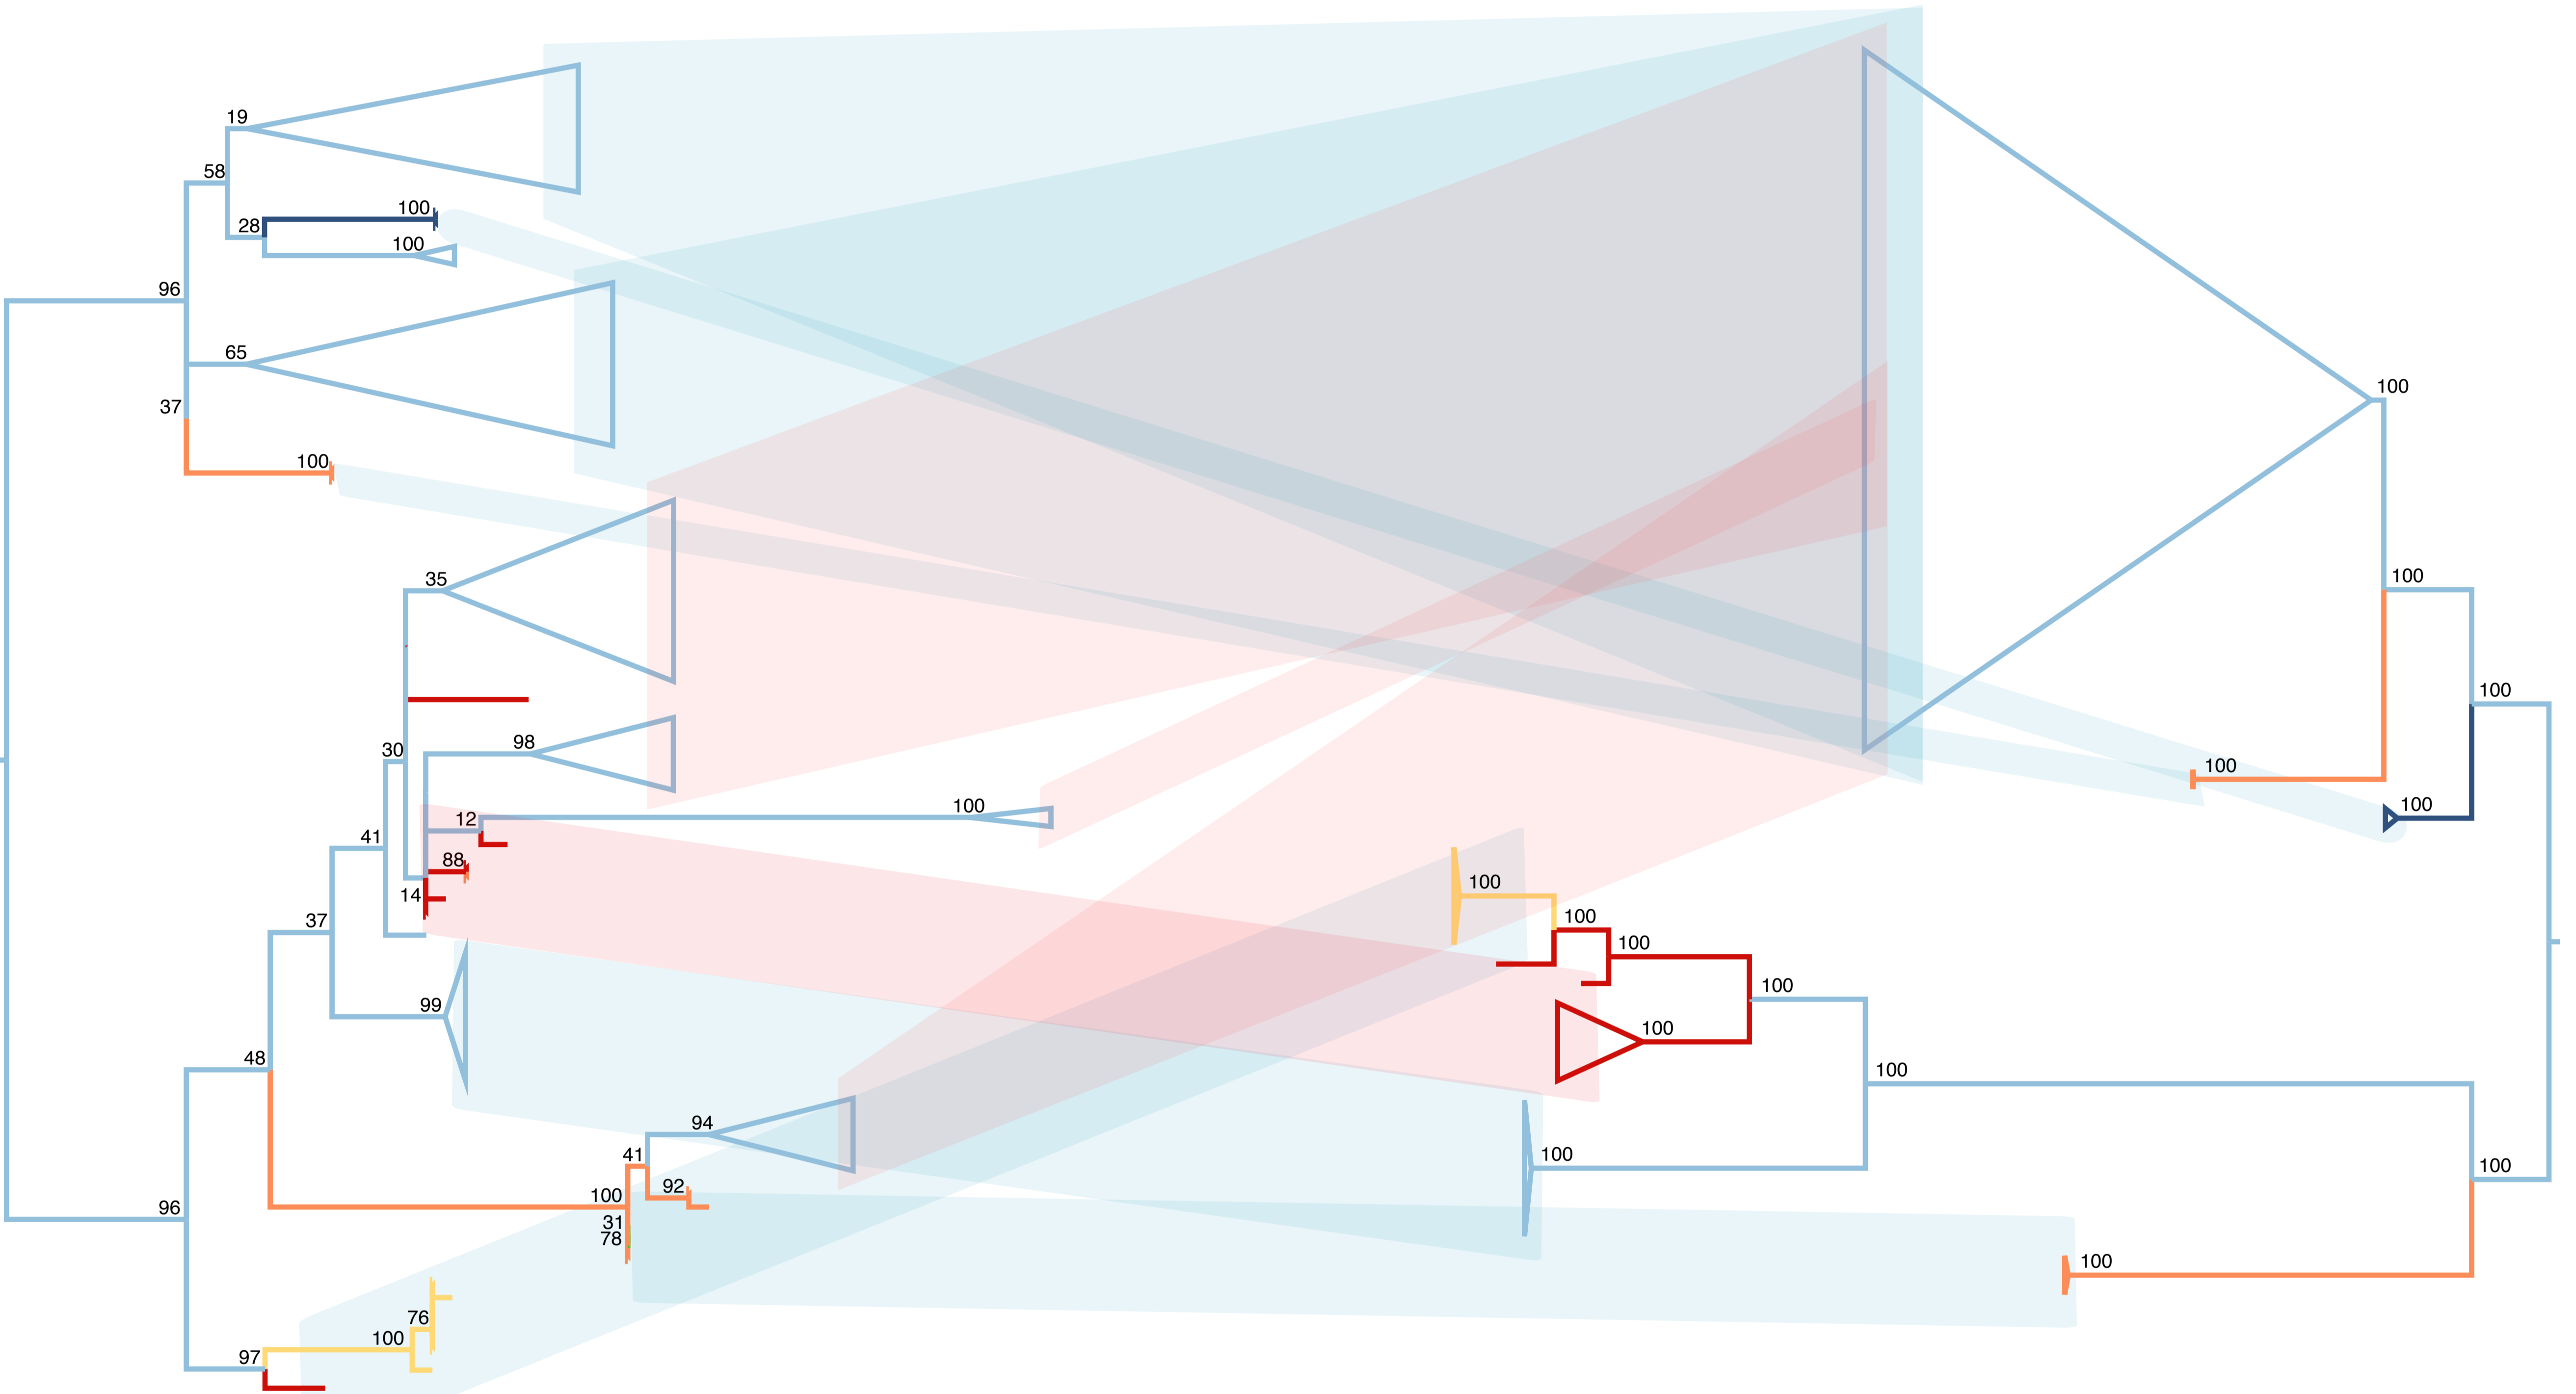

S Segment

L Segment

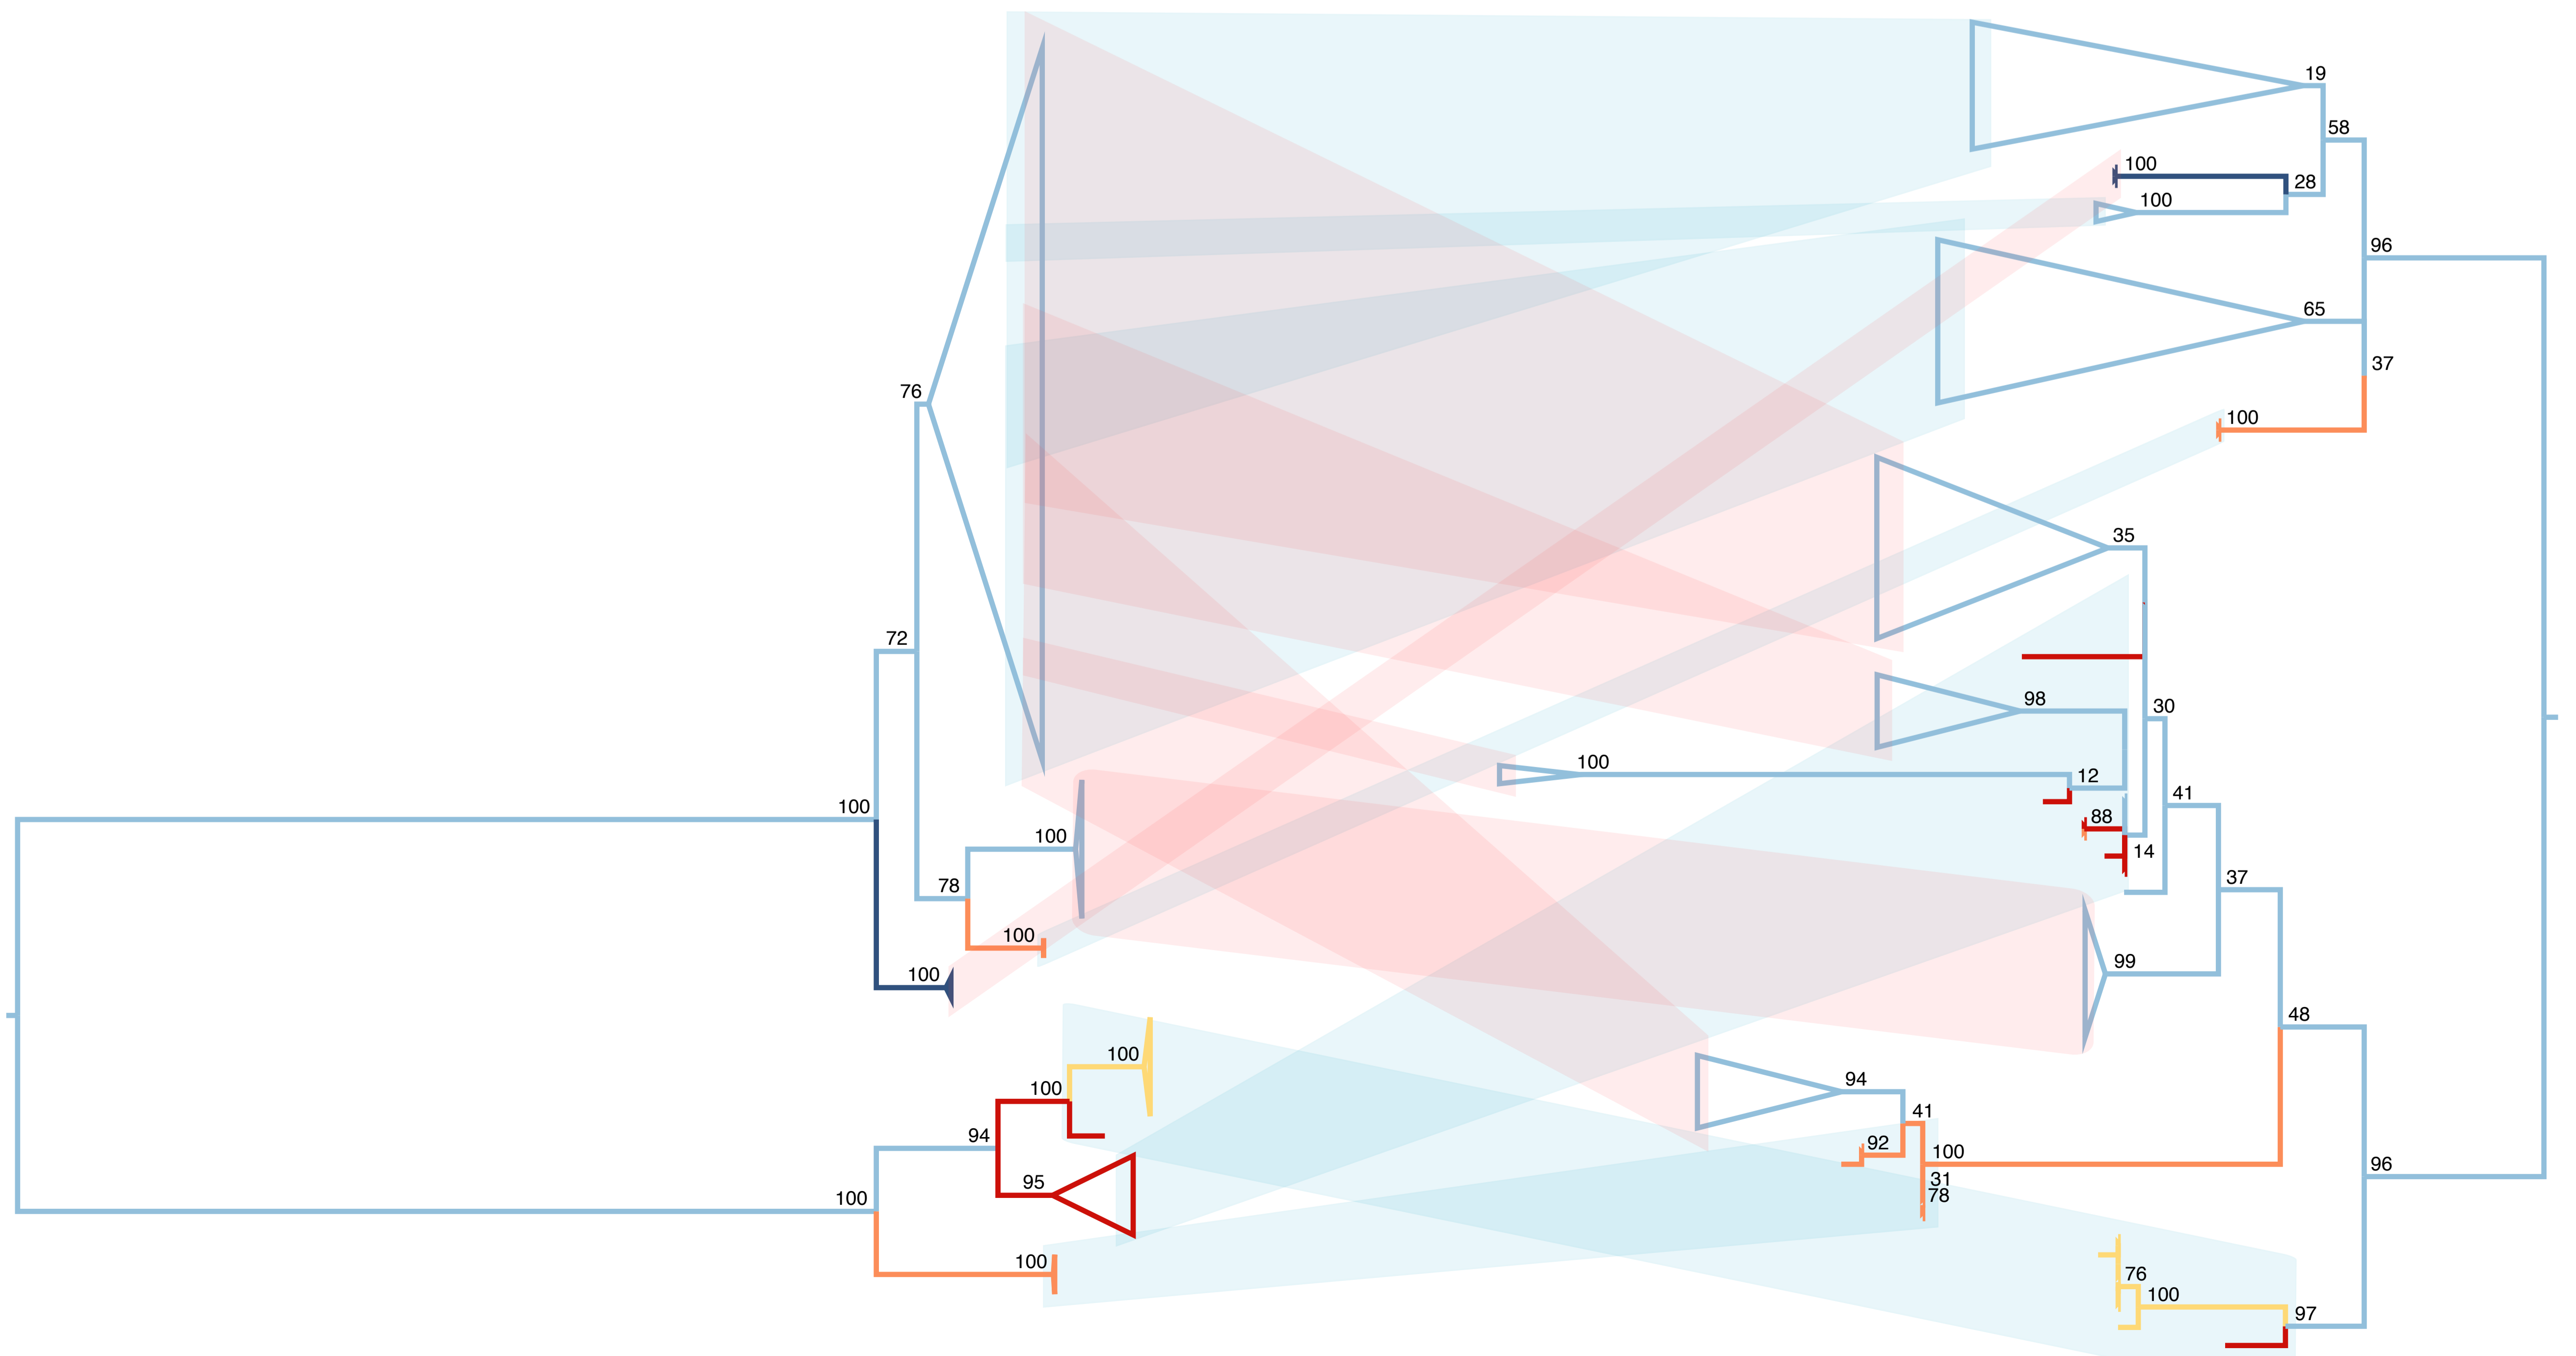

M Segment

S Segment
